# Supplementary material for: A dye-sensitized solar cell based on magnetic CoP@FeP4@Carbon composite counter electrode generated an efficiency of 9.88%
Source: Royal Society of Chemistry journal article supplement (doi:10.1039/d1qi00935d), 2021-01-01
Supplement: d1qi00935d1.pdf [file d1qi00935d1.pdf]

## Supporting Information

### A Dye-Sensitized Solar Cells Based on Magnetic CoP@FeP<sub>4</sub>@Carbon Composite Counter Electrode Generated an Efficiency of 9.88%

Yu Du<sup>a</sup>, Gentian Yue<sup>a,b,\*</sup>, Zhang Lan<sup>b</sup>, Yueyue Gao<sup>a</sup>, Jihuai Wu<sup>b\*</sup>, Furui Tan<sup>a,\*</sup>

<sup>a</sup> Henan Key Laboratory of Photovoltaic Materials and Laboratory of Low-Dimensional Materials Science, Henan University, Kaifeng 475004, China

<sup>b</sup> Fujian Key Laboratory of Functional Materials, Huaqiao University, Xiamen 361021, P. R. China

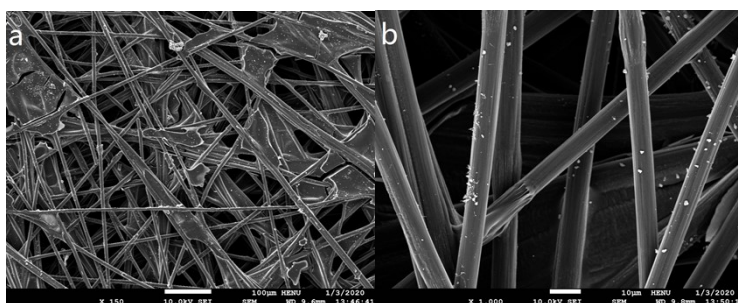

Figure S1 SEM images of (a,b) carbon paper.

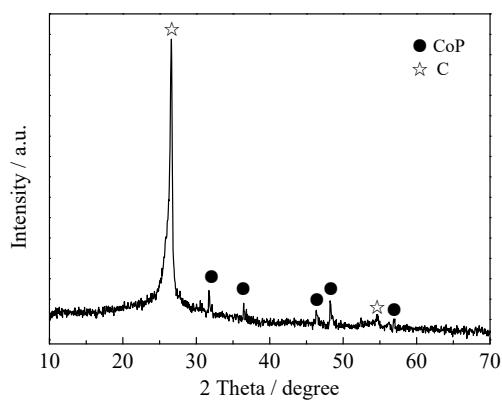

Figure S2 XRD patterns of the CoP @CP CE.

\* Corresponding author. E-mail address: [yuegentian@126.com](mailto:yuegentian@126.com); [jhwu@hqu.edu.cn](mailto:jhwu@hqu.edu.cn); [frtan@henu.edu.cn](mailto:frtan@henu.edu.cn).

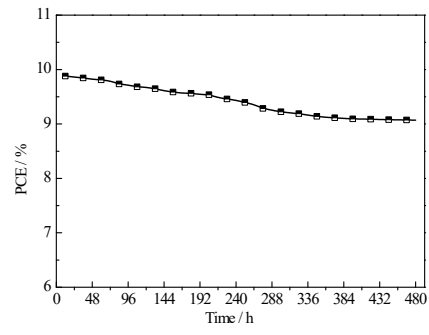

**Figure S3** The long-term stability of the DSSC.
